# Supplementary material
Source: publisher figshare collection journal article supplement (https://acs.figshare.com/ndownloader/files/4711687)
Supplement: Supplementary file 1 [file 4711687]

# SUPPORTING INFORMATION

**Molecular recognition of adeninium cations on anionic metal-oxalato frameworks. An experimental and theoretical analysis.**

Juan P. García-Terán, Oscar Castillo,* Antonio Luque,* Urko García-Couceiro, Garikoitz Beobide and Pascual Román

Departamento de Química Inorgánica, Facultad de Ciencia y Tecnología, Universidad del País Vasco, Apartado 644, E–48080 Bilbao, Spain. Fax: +34 94 601 3500; Tel: +34 94 601 5991; E-mail: [*oscar.castillo@ehu.es*](mailto:oscar.castillo@ehu.es) (O. C.);[*antonio.luque@ehu.es*](mailto:antonio.luque@ehu.es) (A. L.)

S1. CSD references containing noncoordinated adenine.

S2-S3. Coordination modes for the adenine nucleobase compiled in CSD.

S4. Optimized and experimental geometric parameters of cationic nucleobases in the gas phase.

S5. Optimized geometric parameters of cationic nucleobases in a water dielectric medium.

S6. Optimized geometric parameters of dimeric cationic and neutral adenine moieties in the gas phase.

S7. Hydrogen bonding parameters for the optimized adeninium-[Cu(ox)2]2- interactions in the gas phase.

S8. Hydrogen bonding parameters for the optimized adeninium-2[Cu(ox)2]2- system in the gas phase.

S9. Gas phase hydrogen bonding parameters for the optimized tetramer of cationic nucleobases in **1**.

S10. Gas phase hydrogen bonding parameters for the optimized interaction of a cationic nucleobase dimer and a [Cu(ox)2]2- fragment in **1**.

**Table S1.** CSD references containing non-coordinated adenine moieties

| CSD code | Charge | H sitesa | CSD code | Charge | H sites |
| --- | --- | --- | --- | --- | --- |
| ADALEW | + | 9H, 1H | DXCADM10 | 0 | 9H |
| ADENBH | + | 9H, 1H | EGOWIG | + | 9H, 1H |
| ADENCH | + | 9H, 1H | EVIFIY | 0 | 9H |
| ADENDH | +2 | 9H, 1H, 7H | EVIFIY | + | 9H, 1H |
| ADENOH | + | 9H, 1H | FESWUG | + | 9H, 6H |
| ADENPH | + | 9H, 1H | FOMXUB | +2 | 9H, 1H, 7H |
| ADENSL | +2 | 9H, 1H, 7H | FUSVAQ01 | 0 | 9H |
| ADENZN | + | 1H, 7H | GADWEO | +2 | 9H, 1H, 7H |
| ADESUL | + | 9H, 1H | GUNQUB | 0 | 9H |
| ADHCOS10 | + | 9H, 1H | JOZZED | 0 | 9H |
| ADNCHG10 | + | 9H, 1H | LAFSUH | 0 | 9H |
| ADRBFT10 | 0 | 9H | LAFTAO | 0 | 9H |
| AHEWIT | +2 | 9H, 1H, 7H | LEZHIH | + | 9H, 1H |
| AHEWOZ | +2 | 9H, 1H, 7H | OCIQUM | + | 1H, 7H |
| AHEWUF | +2 | 9H, 1H, 7H | PIDQIC | + | 1H, 7H |
| BETNOD | 0 | 9H | SEGCOX | 0 | 7H |
| BETNOD | + | 9H, 1H | TAZWOH | 0 | 9H |
| BEZSII | + | 9H, 6H | TPADEN | - |  |
| BIDRUB | +2 | 9H, 1H, 7H | TUDLOT | + | 9H, 1H |
| BIGHIJ | 0 | 9H | VIGVEM | 0 | 9H |
| BUDVUR | + | 9H, 1H | VIGVEM | + | 9H, 1H |
| COFBII | +2 | 9H, 1H, 7H | ZETGIO | +2 | 9H, 1H, 7H |
| COFBOO | +2 | 9H, 1H, 7H | ZETGOU | + | 9H, 1H |
| COFBUU | 0 | 9H | ZETGUA | + | 9H, 1H |

a) All adenine moieties contains at least two other hydrogen atoms in the N6 site.


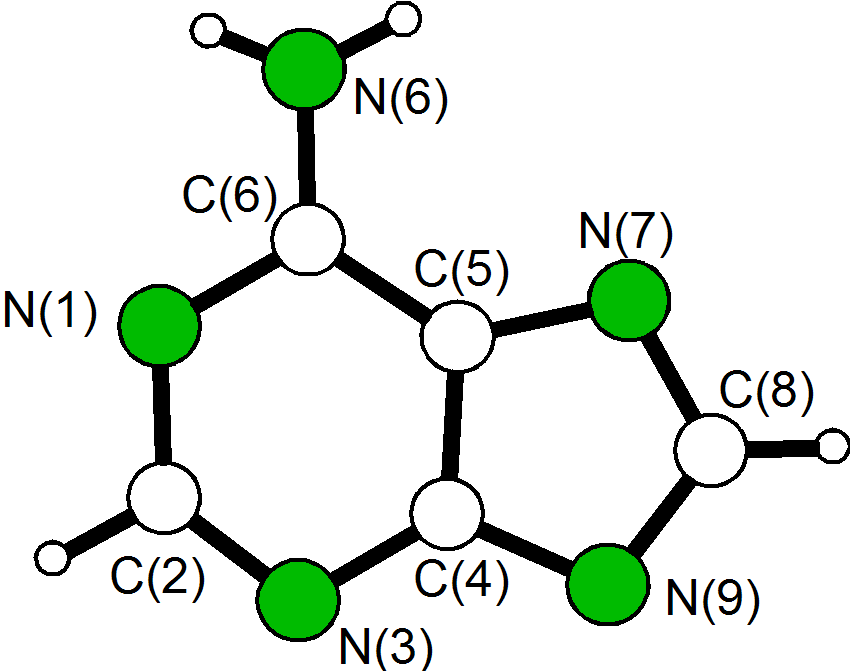


**Table S2a.** CSD references containing metal-adenine bonds.

CSD code Charge H sitesa Metal Donor sites Distances

ADBPPD - Pd N9 2.015

ADDNCU - Cu N9 1.998

ADDNCU - Cu N9 2.035

ADENCO10 - Co N9 1.949

ADHCOS10 0 7H Co N9 2.163

ADMEHH - Hg N9 2.070

BRADCU + 1H, 7H Cu N9 2.013

CADENC + 1H, 7H Cu N9 2.012

CUYCUU - Hg N9 2.070

DARGAE - Au N9 2.039

FASWIG - Au N9 2.035

FASWIG - Au N9 2.041

ICICUT - Co N9 1.950

ICIDAA 0 7H Co N9 1.950

ICIDAA 0 7H Co N9 1.960

ICIDEE + 1H, 7H Co N9 1.966

ICIDII 0 7H Co N9 1.962

ICIDOO - Co N9 1.934

MIQVOX - Cu N9 1.967

OLOWIV 0 7H Zn N9 2.083

SEGCUD 0 7H Cu N9 1.970

VEHPUT - Au N9 2.057

WULXAC - Zn N9 1.922

YURWOX - Cu N9 1.965

ADENZN + 1H, 9H Zn N7 -------

CADENZ02 + 1H, 9H Zn N7 2.079

CADENZ10 + 1H, 9H Zn N7 2.094

FEZJEA 0 9H Pt N7 2.022

FEZJEA 0 9H Pt N7 1.853

QOCTIL + 1H, 9H Ni N7 2.031

QOCTIL + 1H, 9H Ni N7 2.066

UHECUF 0 9H Cu N7 1.978

UHEDIU 0 9H Cu N7 2.017

EGUXUZ 0 9H Cu N3 1.993

FEZJIE 0 9H Pt N3 2.036

LAFSUH 0 9H Co N3 2.111

LAFTAO 0 9H Zn N3 2.114

PEKPEA 0 7H Ni N3 2.081

RIWYUR 0 9H Pd N3 2.128

RIWZAY 0 9H Pd N3 2.126

UHEDAM 0 9H Cu N3 1.981

UHEDOA 0 9H Cu N3 1.891

ADHGND10 - Hg N9, N7 2.082, 2.078

ADMEHI - Hg N9, N7 2.136, 2.118

DUXDIJ - Hg N9, N7 2.066, 2.091

MUNXUO 0 3H Cu N9, N7 1.988, 2.005

SULYON 0 1H Ru N9, N7 2.117, 2.108

a) Non N6-bound adenine ligands show two other hydrogen atoms in N6 site.

**Table S2b.** CSD references containing metal-adenine bonds.

CSD code Charge H sitesa Metal Donor sites Distances

ADAGPC + 1H, 7H Ag N9, N3 2.154, 2.193

ADAQCU 0 7H Cu N9, N3 2.013, 2.038

ADAQCU 0 7H Cu N9, N3 2.032, 2.003

ADCDNO10 + 1H, 7H Cd N9, N3 2.349, 2.414

ADEHCU10 + 1H, 7H Cu N9, N3 2.028, 2.027

AMPUCU10 - Cu N9, N3 2.000, 2.034

AMPUCU10 - Cu N9, N3 2.014, 2.031

CADCUC 0 7H Cu N9, N3 2.008, 2.043

SUFHAC - Pd N9, N3 2.029, 2.055

VAZTEW - Cu N9, N3 2.002, 2.025

VAZTEW - Cu N9, N3 2.012, 2.023

CARCEE 0 7H Cu N9, N1 2.025, 2.020

UHEDEQ 0 9H Cu N7, N3 1.993, 2.046

UHEDEQ 0 9H Cu N7, N3 2.011, 2.012

FEDCOG -2 Hg N9, N6 2.077, 2.073

FEDCOG -2 Hg N9, N6 2.050, 2.042

TIWQEV - 1H Ru N9, N7, N6 2.079, 2.113, 2.148

XEDMEY - 1H Ir N9, N7, N6 2.055, 2.116, 2.167

XEDMEY - 1H Ir N9, N7, N6 2.114, 2.143, 2.144

XEDMEY - 1H Ir N9, N7, N6 2.080, 2.157, 2.146

XEDMEY - 1H Ir N9, N7, N6 2.108, 2.115, 2.178

ADHGNO - Hg N9, N7, N3 2.097, 2.086, 2.132

ADMEHG - Hg N9, N7, N3 2.102, 2.069, 2.073

ADMEHG - Hg N9, N7, N3 2.112, 2.059, 2.098

DUXDIJ - Hg N9, N7, N3 2.085, 2.106, 2.121

DUXDOP - Hg N9, N7, N3 2.099, 2.106, 2.124

PECNUH - Cu N9, N3, N7 1.991, 2.028, 1.945

PECNUH - Cu N9, N3, N7 2.001, 2.018, 1.955

XACZEH - Cu N9, N7, N3 2.003, 1.997, 2.014

XACZEH - Cu N9, N7, N3 2.013, 1.985, 1.999

CAVHIQ10 -3 Hg N9, N6, N6 2.046, 2.082, 1.996

FAKNAG -3 Hg N9, N3, N6, N6 2.099, 2.134, 2.048, 2.117

a) Non N6-bound adenine ligands show two other hydrogen atoms in N6 site.

|  |  |
| --- | --- |
|  |  |

**Table S3.** Optimized and experimental geometric parameters of cationic nucleobases in the gas phase

| Optimized | | | | Experimental | | | |
| --- | --- | --- | --- | --- | --- | --- | --- |
|  | 1H,9H-adeninium | 3H,7H-adeninium | 1H,7H-  adeninium | 1H,9H-adeninium  mol. A | 1H,9H-adeninium  mol. B | 3H,7H-adeninium in **2** | 3H,7H-adeninium in **3** |
| N1-C2 | 1.385 | 1.307 | 1.386 | 1.316 | 1.338 | 1.275 | 1.281 |
| N1-C6 | 1.371 | 1.363 | 1.369 | 1.362 | 1.375 | 1.433 | 1.469 |
| C2-N3 | 1.298 | 1.356 | 1.293 | 1.324 | 1.303 | 1.377 | 1.390 |
| N3-C4 | 1.351 | 1.366 | 1.357 | 1.350 | 1.356 | 1.345 | 1.342 |
| C4-C5 | 1.402 | 1.399 | 1.418 | 1.378 | 1.379 | 1.408 | 1.422 |
| C5-C6 | 1.406 | 1.414 | 1.398 | 1.408 | 1.387 | 1.371 | 1.327 |
| C6-N6 | 1.331 | 1.335 | 1.342 | 1.306 | 1.309 | 1.317 | 1.316 |
| C5-N7 | 1.371 | 1.386 | 1.379 | 1.376 | 1.389 | 1.360 | 1.358 |
| N7-C8 | 1.313 | 1.364 | 1.371 | 1.312 | 1.310 | 1.348 | 1.342 |
| C8-N9 | 1.382 | 1.324 | 1.316 | 1.354 | 1.344 | 1.330 | 1.324 |
| N9-C4 | 1.362 | 1.350 | 1.359 | 1.356 | 1.357 | 1.341 | 1.339 |
| C2-N1-C6 | 123.5 | 120.8 | 123.7 | 124.1 | 124.1 | 121.0 | 121.0 |
| N1-C2-N3 | 124.3 | 124.3 | 124.2 | 126.8 | 127.0 | 126.3 | 125.6 |
| C2-N3-C4 | 113.4 | 118.1 | 115.0 | 109.8 | 109.1 | 114.0 | 113.6 |
| N3-C4-C5 | 126.9 | 119.5 | 123.7 | 128.4 | 129.2 | 123.4 | 124.0 |
| N3-C4-N9 | 126.7 | 127.6 | 125.6 | 125.2 | 126.0 | 128.1 | 127.4 |
| C5-C4-N9 | 104.4 | 113.0 | 110.7 | 106.3 | 104.8 | 108.5 | 108.6 |
| C4-C5-C6 | 117.9 | 119.6 | 120.1 | 117.5 | 118.1 | 119.8 | 120.6 |
| C4-C5-N7 | 111.8 | 103.3 | 104.8 | 111.5 | 111.9 | 107.2 | 106.4 |
| C6-C5-N7 | 130.3 | 137.1 | 135.1 | 130.9 | 130.0 | 133.0 | 133.0 |
| N1-C6-C5 | 113.9 | 117.8 | 113.2 | 113.2 | 112.4 | 115.0 | 115.2 |
| C5-C6-N6 | 124.0 | 125.8 | 127.1 | 125.2 | 125.8 | 123.9 | 124.4 |
| N1-C6-N6 | 122.1 | 116.4 | 119.7 | 121.6 | 121.8 | 120.6 | 120.4 |
| C5-N7-C8 | 103.8 | 106.7 | 106.0 | 101.5 | 101.3 | 105.2 | 105.6 |
| N7-C8-N9 | 113.2 | 113.4 | 113.8 | 116.2 | 115.6 | 113.3 | 113.7 |
| C4-N9-C8 | 106.8 | 103.6 | 104.8 | 104.5 | 106.3 | 105.8 | 105.7 |

**Table S4.** Optimized geometric parameters of cationic nucleobases in a water dielectric medium.

| Parameters | | | | Mulliken charges | | | | |
| --- | --- | --- | --- | --- | --- | --- | --- | --- |
|  | 1H,9H-adeninium | 3H,7H-adeninium | 1H,7H-  adeninium |  | 1H,9H-adeninium | | 3H,7H-adeninium | 1H,7H-  adeninium |
| N1-C2 | 1.384 | 1.305 | 1.383 | N1 | –0.663 | | –0.473 | –0.655 |
| N1-C6 | 1.372 | 1.365 | 1.372 | H1 | 0.396 | | ------- | 0.400 |
| C2-N3 | 1.300 | 1.357 | 1.295 | C2 | 0.263 | | 0.270 | 0.256 |
| N3-C4 | 1.351 | 1.366 | 1.361 | H2 | 0.245 | | 0.233 | 0.228 |
| C4-C5 | 1.400 | 1.398 | 1.413 | N3 | –0.450 | | –0.643 | –0.449 |
| C5-C6 | 1.409 | 1.416 | 1.406 | H3 | ------- | | 0.392 | ------- |
| C6-N6 | 1.328 | 1.332 | 1.333 | C4 | 0.561 | | 0.504 | 0.424 |
| C5-N7 | 1.373 | 1.386 | 1.378 | C5 | 0.199 | | 0.352 | 0.324 |
| N7-C8 | 1.312 | 1.363 | 1.367 | C6 | 0.671 | | 0.573 | 0.693 |
| C8-N9 | 1.382 | 1.325 | 1.319 | N6 | –0.768 | | –0.752 | –0.776 |
| N9-C4 | 1.364 | 1.350 | 1.364 | H6A | 0.397 | | 0.406 | 0.414 |
| C2-N1-C6 | 123.7 | 120.8 | 123.9 | H6B | 0.416 | | 0.382 | 0.405 |
| N1-C2-N3 | 124.3 | 124.4 | 124.6 | N7 | –0.487 | | –0.687 | –0.682 |
| C2-N3-C4 | 113.2 | 118.0 | 114.6 | H7 | ------- | | 0.383 | 0.385 |
| N3-C4-C5 | 127.2 | 119.5 | 123.8 | C8 | 0.263 | | 0.276 | 0.266 |
| N3-C4-N9 | 128.4 | 127.5 | 125.5 | H8 | 0.215 | | 0.239 | 0.217 |
| C5-C4-N9 | 104.5 | 113.0 | 110.6 | N9 | –0.637 | | –0.455 | –0.448 |
| C4-C5-C6 | 117.8 | 119.6 | 120.5 | H9 | 0.379 | | ------- | ------- |
| C4-C5-N7 | 111.7 | 103.3 | 105.0 |  |  | |  |  |
| C6-C5-N7 | 130.5 | 137.1 | 134.5 |  |  | |  |  |
| N1-C6-C5 | 113.8 | 117.6 | 112.5 |  |  | |  |  |
| C5-C6-N6 | 124.2 | 126.0 | 127.4 |  |  | |  |  |
| N1-C6-N6 | 122.0 | 116.4 | 120.0 |  |  | |  |  |
| C5-N7-C8 | 103.8 | 106.8 | 106.0 |  |  | |  |  |
| N7-C8-N9 | 113.2 | 113.4 | 113.8 |  |  | |  |  |
| C4-N9-C8 | 106.8 | 103.5 | 104.5 |  |  | |  |  |
| ZPVE corrected | | 1H,9H-adeninium | | 3H,7H-adeninium | | 1H,7H-adeninium | | |
| Energy in solution (Kcal/mol) | | 0 | | +0.525 | | +4.406 | | |
|  (Debye) | | 4.5 | | 3.4 | | 10.9 | | |

| **Optimized interaction I** | | | | | | | |
| --- | --- | --- | --- | --- | --- | --- | --- |
| 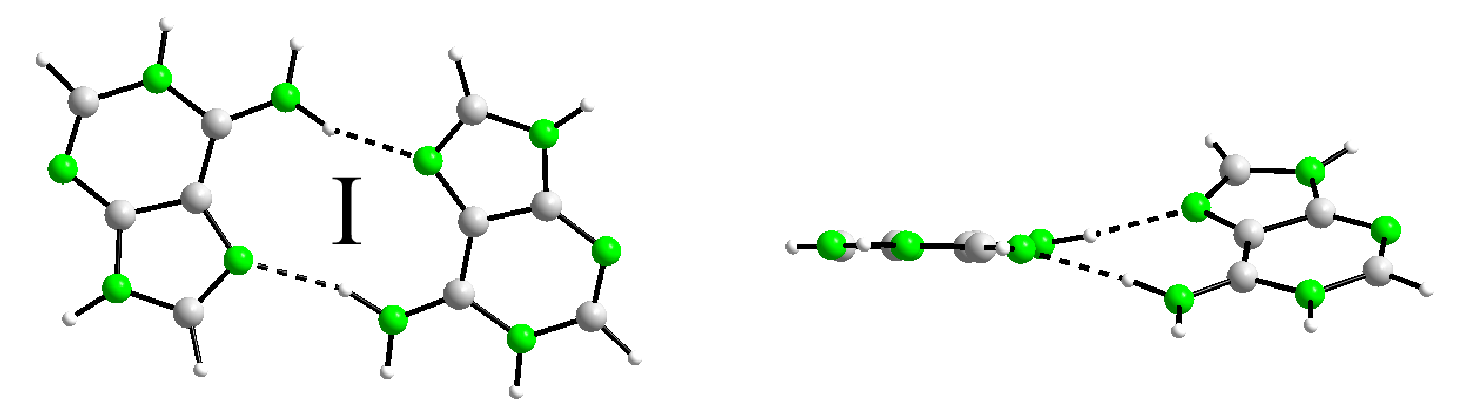 | | | | | | | |
| N6-H6: 1.030 Å N6…N7: 3.019 Å N6-H6…N7: 163.8º | | | | | | | |
| Angleopt | Angleexp | DCopt | DCexp | DC(imd)opt | DC(imd)exp | DC(pym)opt | DC(pym)exp |
| 32.92º | 3.86º | 6.175 | 6.165 | 6.043 | 5.978 | 7.466 | 7.481 |
| **Optimized interaction II** | | | | | | | |
| 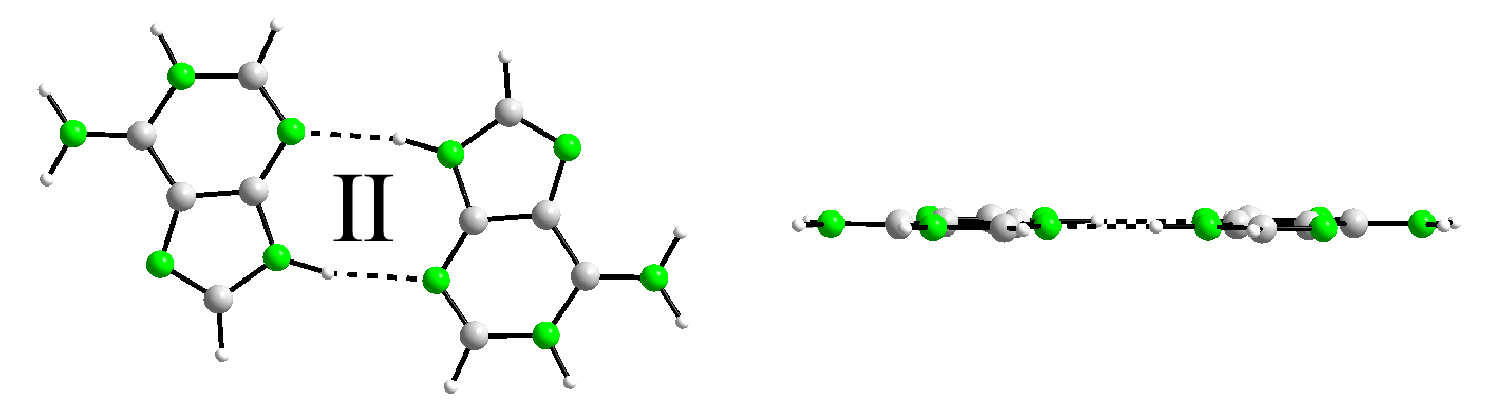 | | | | | | | |
| N9-H9: 1.026 Å N9…N3: 3.106 Å N9-H9…N3: 167.2º | | | | | | | |
| Angleopt | Angleexp | DCopt | DCexp | DC(imd)opt | DC(imd)exp | DC(pym)opt | DC(pym)exp |
| 0.00º | 3.86º | 6.303 | 6.132 | 5.781 | 5.734 | 6.300 | 6.066 |
| **Optimized interaction I + [Cu(ox)2]2-** | | | | | | | |
| 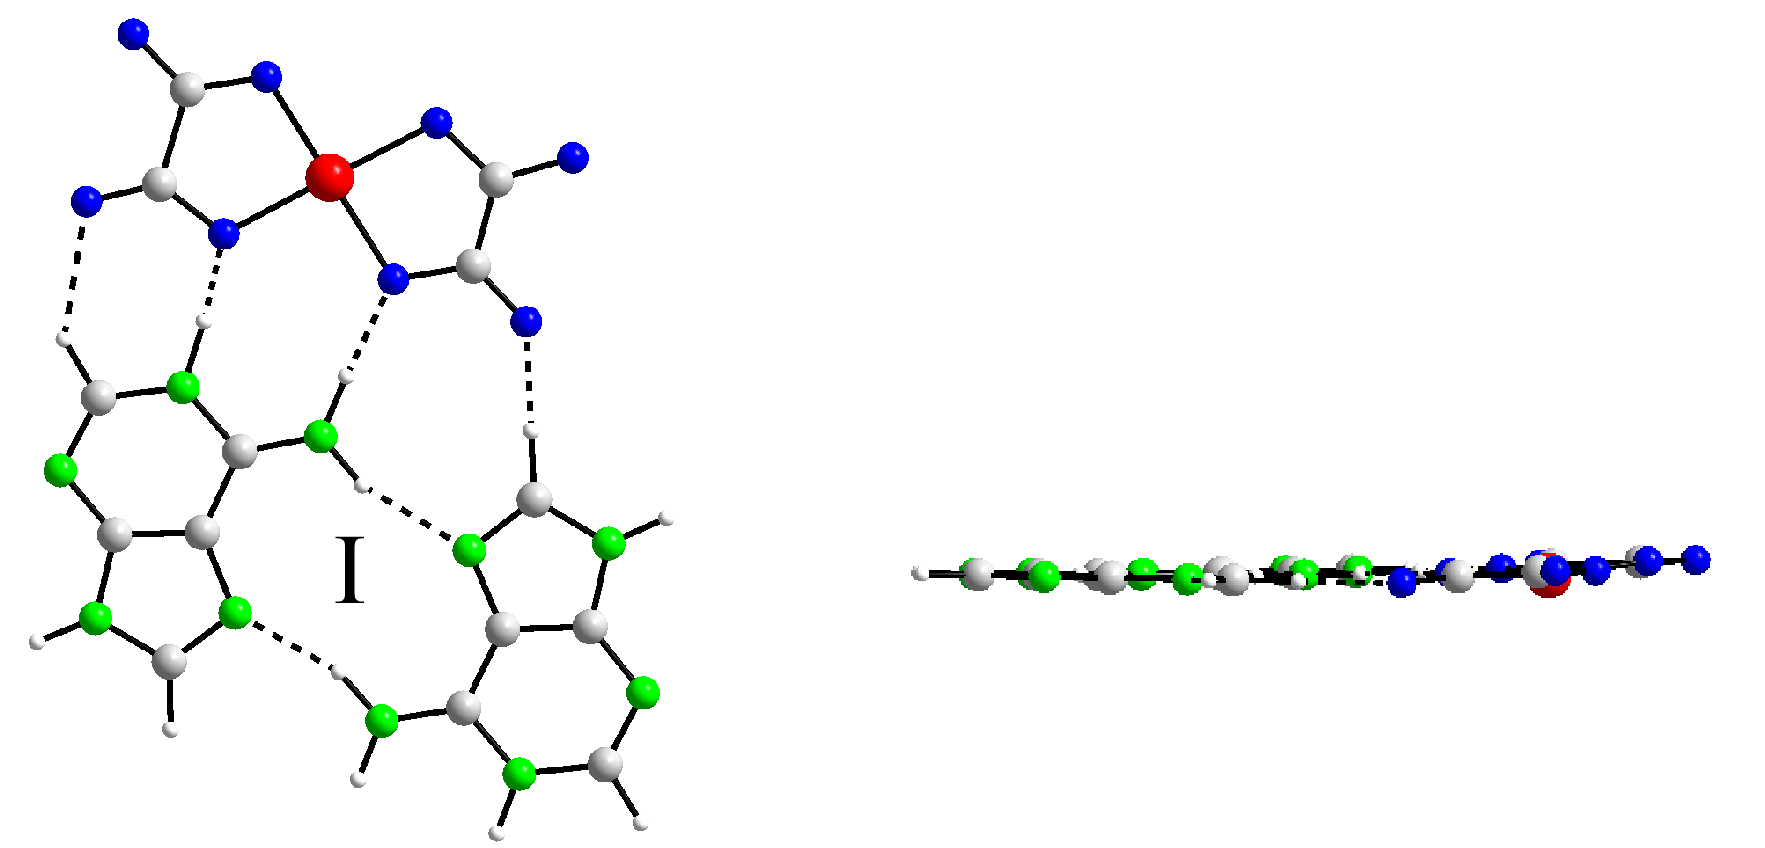 | | | | | | | |
| Interaction I: N6-H6: 1.043 Å; N6…N7: 2.910 Å; N6-H6…N7: 160.8º; N6-H6: 1.021 Å; N6…N7: 2.989 Å; N6-H6…N7: 161.6º. | | | | | | | |
| Interaction with [Cu(ox)2]2-: C8-H8: 1.105 Å; C8…O: 2.846 Å; C8-H8…O: 169.7º; N6-H6: 1.049 Å; N6…O: 2.776 Å; N6-H6…O: 177.0º; N1-H1: 1.117 Å; N1…O: 2.550 Å; N1-H1…O: 175.3º; C2-H2: 1.091 Å; C2…O: 3.150 Å; C2-H2…O: 139.8º. | | | | | | | |
| Angleopt | Angleexp | DCopt | DCexp | DC(imd)opt | DC(imd)exp | DC(pym)opt | DC(pym)exp |
| 2.06º | 3.86º | 6.175 | 6.165 | 6.058 | 5.978 | 7.483 | 7.481 |
| Optimized interaction I between neutral adenine moieties | | | | | | | |
| N6-H6: 1.023 Å N6…N7: 3.034 Å N6-H6…N7: 165.1º | | | | | | | |
| Angleopt | Angleexp | DCopt | DCexp | DC(imd)opt | DC(imd)exp | DC(pym)opt | DC(pym)exp |
| 36.04º | 3.86º | 6.134 | 6.165 | 6.024 | 5.978 | 6.811 | 7.481 |
| Optimized interaction II between neutral adenine moieties | | | | | | | |
| N9-H9: 1.037 Å N9…N3: 2.922 Å N9-H9…N3: 168.3º | | | | | | | |
| Angleopt | Angleexp | DCopt | DCexp | DC(imd)opt | DC(imd)exp | DC(pym)opt | DC(pym)exp |
| 0.00º | 3.86º | 6.126 | 6.132 | 5.584 | 5.734 | 6.167 | 6.066 |
| **Figure S2**. Hydrogen bonding parameters for the optimized interactions I and II in compound **1**. Angle: Dihedral between the mean planes of the adeninium cations. DC: distance between entire nucleobase centroids. DC(imd): centroid-centroid distance between the imidazolic rings. DC(pym): centroid-centroid distance between the pyrimidinic rings. | | | | | | | |

| **1H,9H-** | | **3H,7H-** | |
| --- | --- | --- | --- |
| 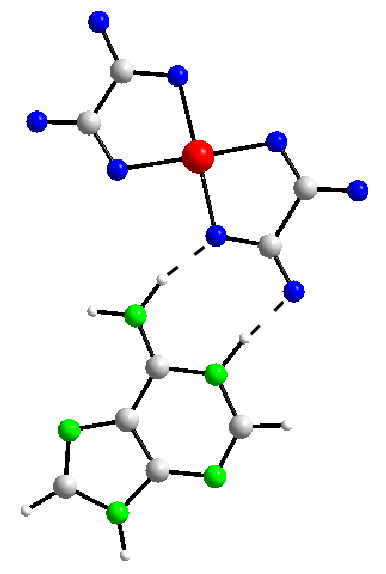  +10.32 Kcal/mol | | 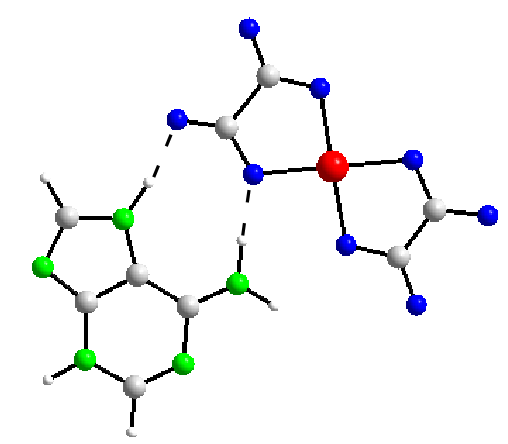  +7.70 Kcal/mol | |
| N6-H6: 1.050 Å  N6…O: 2.660 Å  N6-H6…O: 165.4º | N1-H1: 1.086 Å  N1…O: 2.670 Å  N1-H1…O: 172.4º | N6-H6: 1.041 Å  N6-O: 2.663 Å  N6-H6…O: 176.3º | N7-H7: 1.069 Å  N7-O: 2.715 Å  N7-H7…O: 169.8º |
| 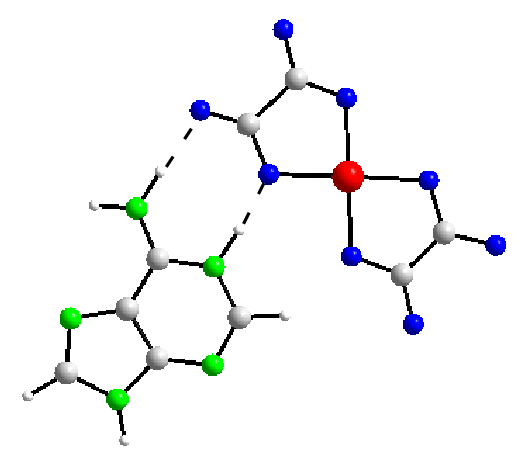  +3.84 Kcal/mol | | 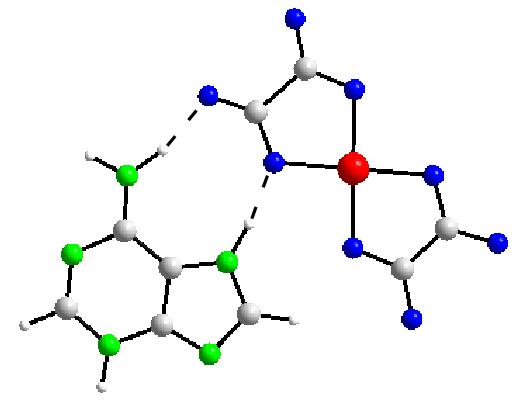  +7.08 Kcal/mol | |
| N6-H6: 1.051 Å  N6…O: 2.818 Å  N6-H6…O: 179.7º | N1-H1: 1.074 Å  N1…O: 2.595 Å  N1-H1…O: 174.0º | N6-H6: 1.054 Å  N6…O: 2.748 Å  N6-H6…O: 165.5º | N7-H7: 1.054 Å  N7…-O: 2.651 Å  N7-H7…O: 172.9º |
| 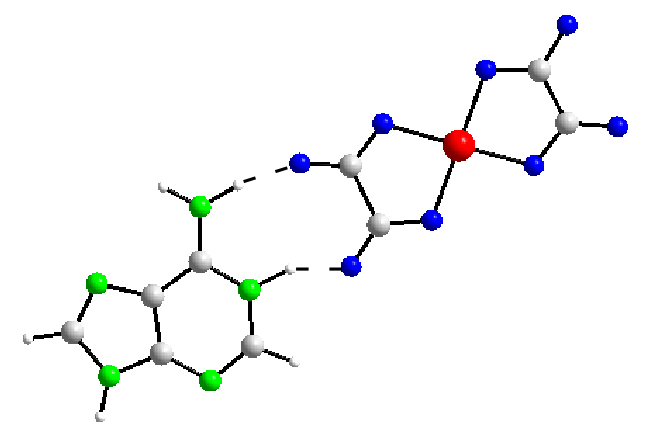  +12.06 Kcal/mol | | 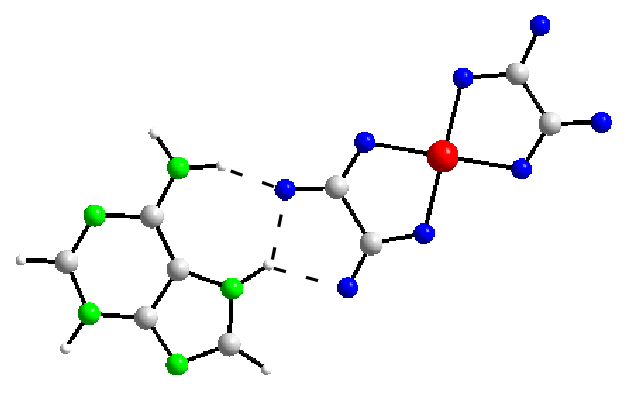  +14.88 Kcal/mol | |
| N6-H6: 1.052 Å  N6…O: 2.623 Å  N6-H6…O: 169.7º | N1-H1: 1.103 Å  N1…O: 2.528 Å  N1-H1…O: 155.2º | N6-H6: 1.047Å  N6…O: 2.624 Å  N6-H6…O: 156.5º | N7-H7: 1.049Å  N7…O: 2.699, 2.779 Å  N7-H7…O: 135.4, 130.9º |
| 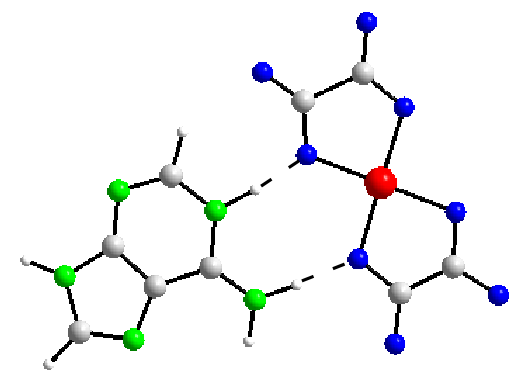  0 Kcal/mol | | 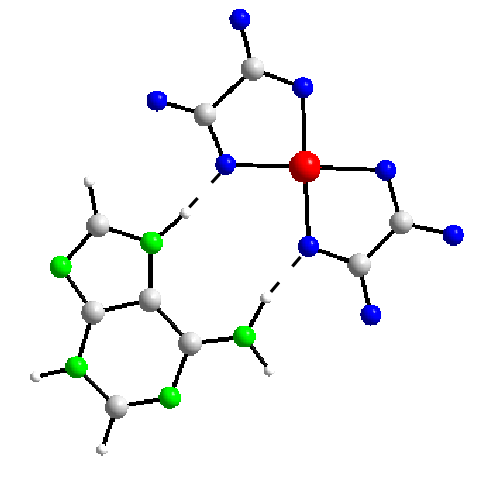  +3.06 Kcal/mol | |
| N6-H6: 1.065 Å  N6…O: 2.674 Å  N6-H6…O: 176.4º | N1-H1: 1.093 Å  N1…O: 2.579 Å  N1-H1…O: 173.3º | N6-H6: 1.058 Å  N6…O: 2.664 Å  N6-H6…O: 169.5º | N7-H7: 1.084 Å  N7…O: 2.592 Å  N7-H7…O: 170.3º |
| **Figure S3**. Hydrogen bonding parameters for the optimized adeninium-[Cu(ox)2]2- interactions. | | | |

| **1H,9H-** | | **3H,7H-** | |
| --- | --- | --- | --- |
| 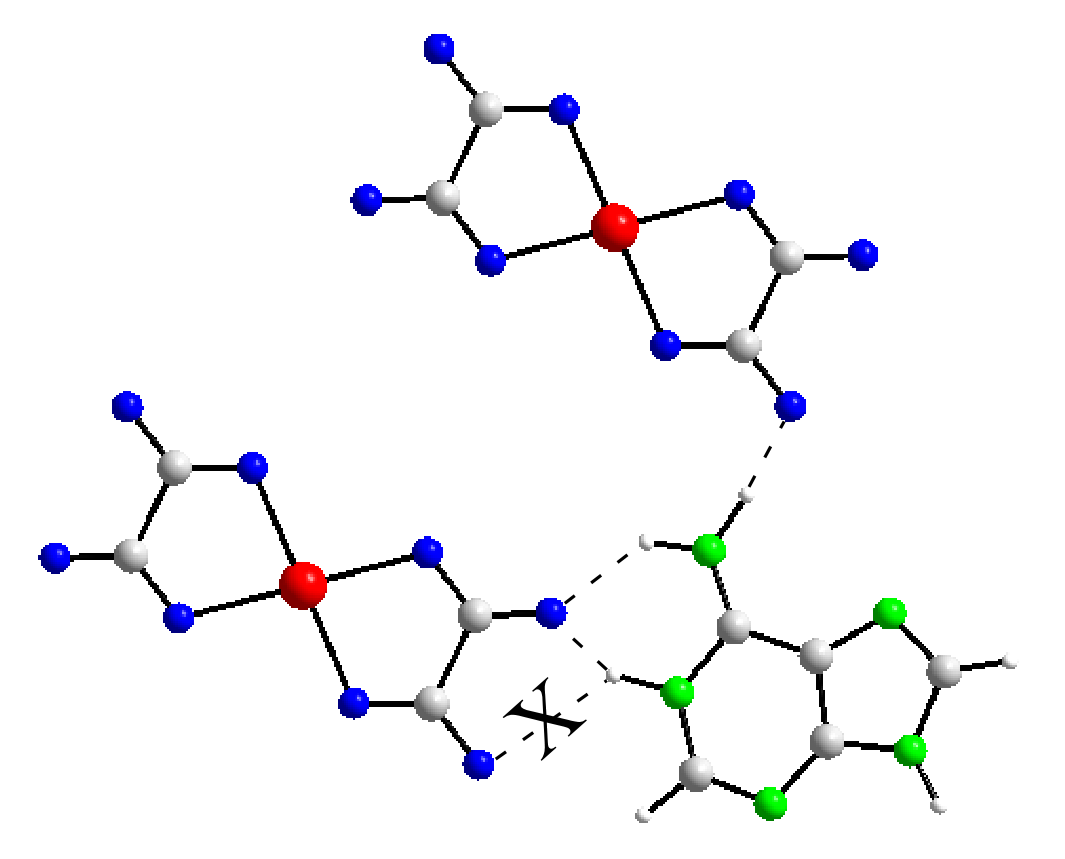  +1.22 Kcal/mol | | 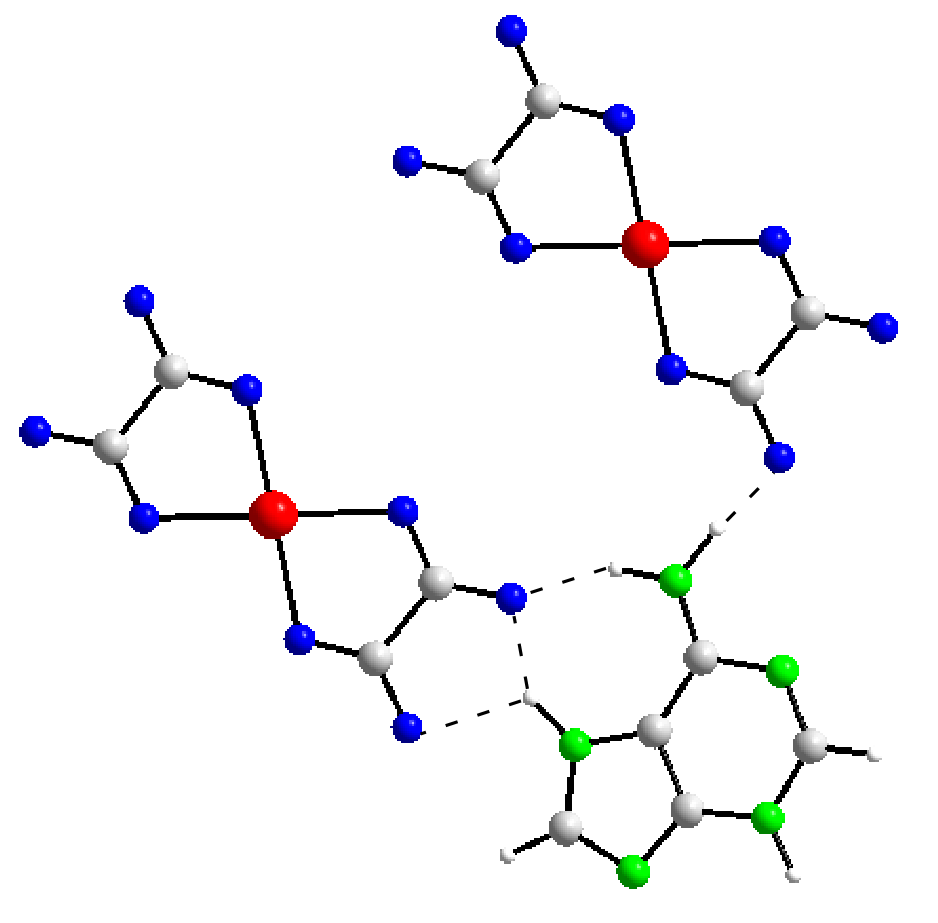  0 Kcal/mol | |
| N1-H1: 1.094 Å  N1…O: 2.475 Å  N1-H1…O: 152.0º  N1-H1: 1.094 Å  N1…O: 3.424 Å  N1-H1…O: 130.6º | N6-H6A: 1.029 Å  N6…O: 2.781 Å  N6-H6A…O: 136.6º  N6-H6B: 1.087 Å  N6…O: 2.659 Å  N6-H6B…O: 171.0º | N7-H7: 1.065 Å  N7…O: 2.600 Å  N7-H7…O: 147.0º  N7-H7: 1.065 Å  N7…O: 2.805 Å  N7-H7…O: 121.4º | N6-H6A: 1.092 Å  N6…O: 2.638 Å  N6-H6A…O: 176.5º  N6-H6B: 1.032 Å  N6…O: 2.844 Å  N6-H6B…O: 155.3º |
| **Figure S4**. Hydrogen bonding parameters for the optimized adeninium-2[Cu(ox)2]2- system. | | | |

| 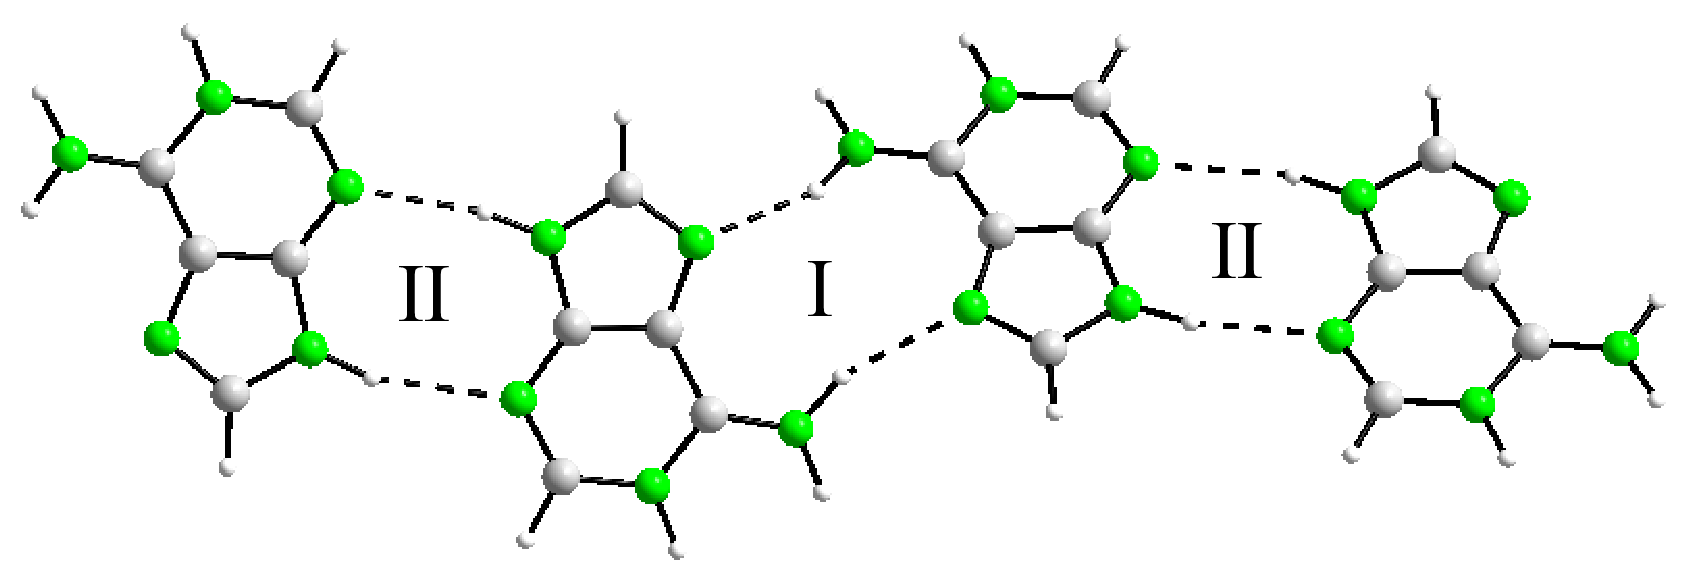 | 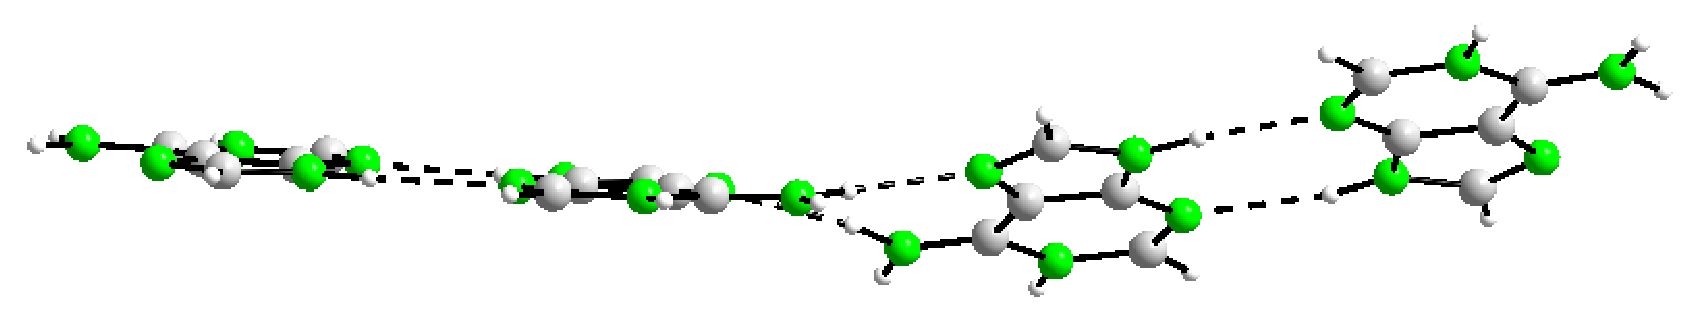 |
| --- | --- |
| Interaction I:  N6-H6: 1.026 Å  N6…N7: 3.147 Å  N6-H6…N7: 159.1º | Interaction II:  a) N9-H9: 1.020 Å  N9…N3: 3.234 Å  N9-H9…N3: 163.9º  b) N9-H9: 1.032 Å  N9…N3: 3.153 Å  N9-H9…N3: 168.5º |
| **Figure S5**. Hydrogen bonding parameters for the optimized tetramer of cationic nucleobases in **1**. | |

| 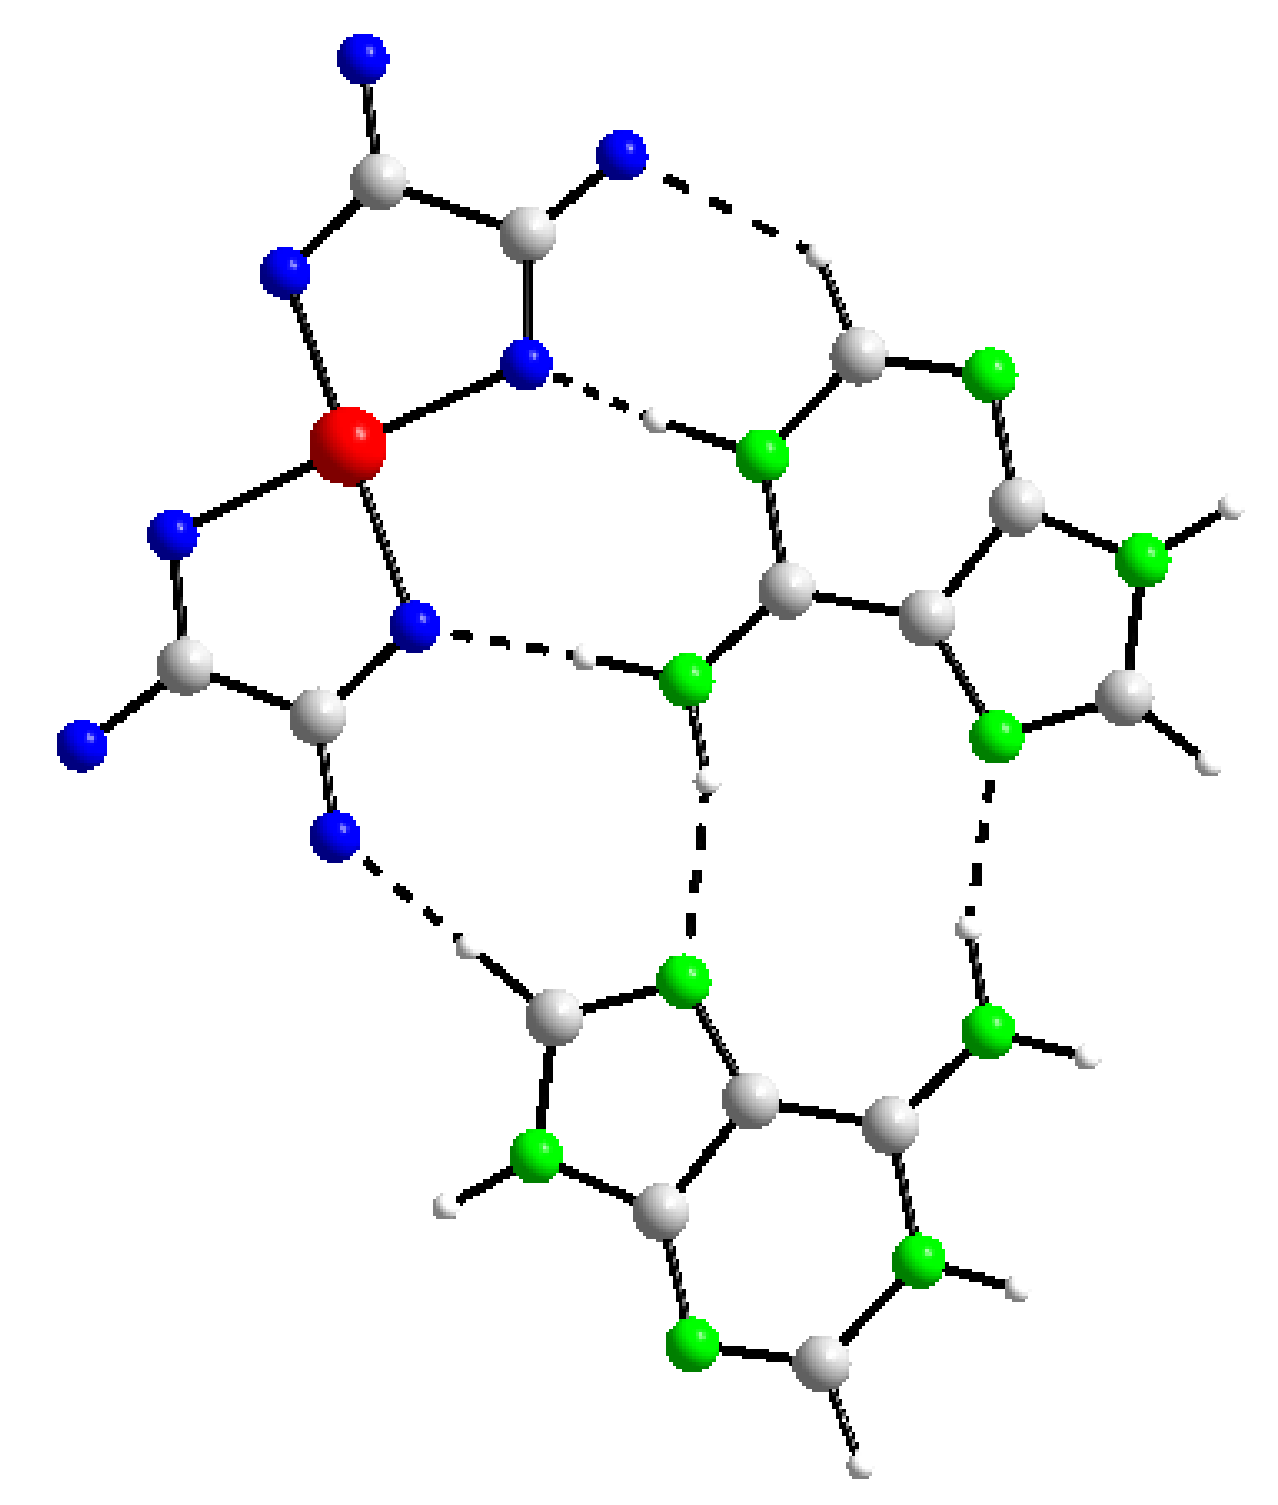 | 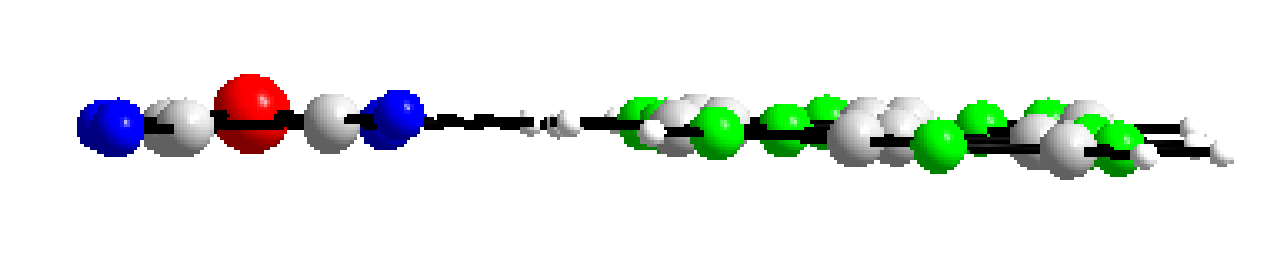 |
| --- | --- |
| N1-H1: 1.117 Å  N1…O: 2.550 Å  N1-H1…O: 175.3º  C2-H2: 1.010 Å  N1…O: 3.150 Å  C2-H2…O: 139.8º | N6-H6: 1.049 Å  N6…O: 2.776 Å  N6-H6…O:177.0º  C8-H8: 1.105 Å  C8…O: 2.846 Å  C8-H8…O: 179.7º |
| **Figure S6**. Hydrogen bonding parameters for the optimized interaction of a cationic nucleobase dimer and a [Cu(ox)2]2- fragment in **1**. | |
